# Supplementary material
Source: publisher site journal article supplement (https://www.spandidos-publications.com/3063/downloadSupplementary)

Figure S1. Corresponding hematoxylin and eosin images of Fig. 1. (A and B) Normal thyroid tissues. (C) Paracancerous thyroid tissues. (D) Thyroid cancer tissues,  $>4$  cm. (E) Thyroid cancer tissues with extracapsular invasion. (F) Thyroid cancer tissues with lymph node metastasis. (G) Thyroid cancer tissues,  $\leq 2$  cm. (H) Thyroid cancer tissues without extracapsular invasion. (I) Thyroid cancer tissues without lymph node metastasis. Magnification,  $\times 400$ .

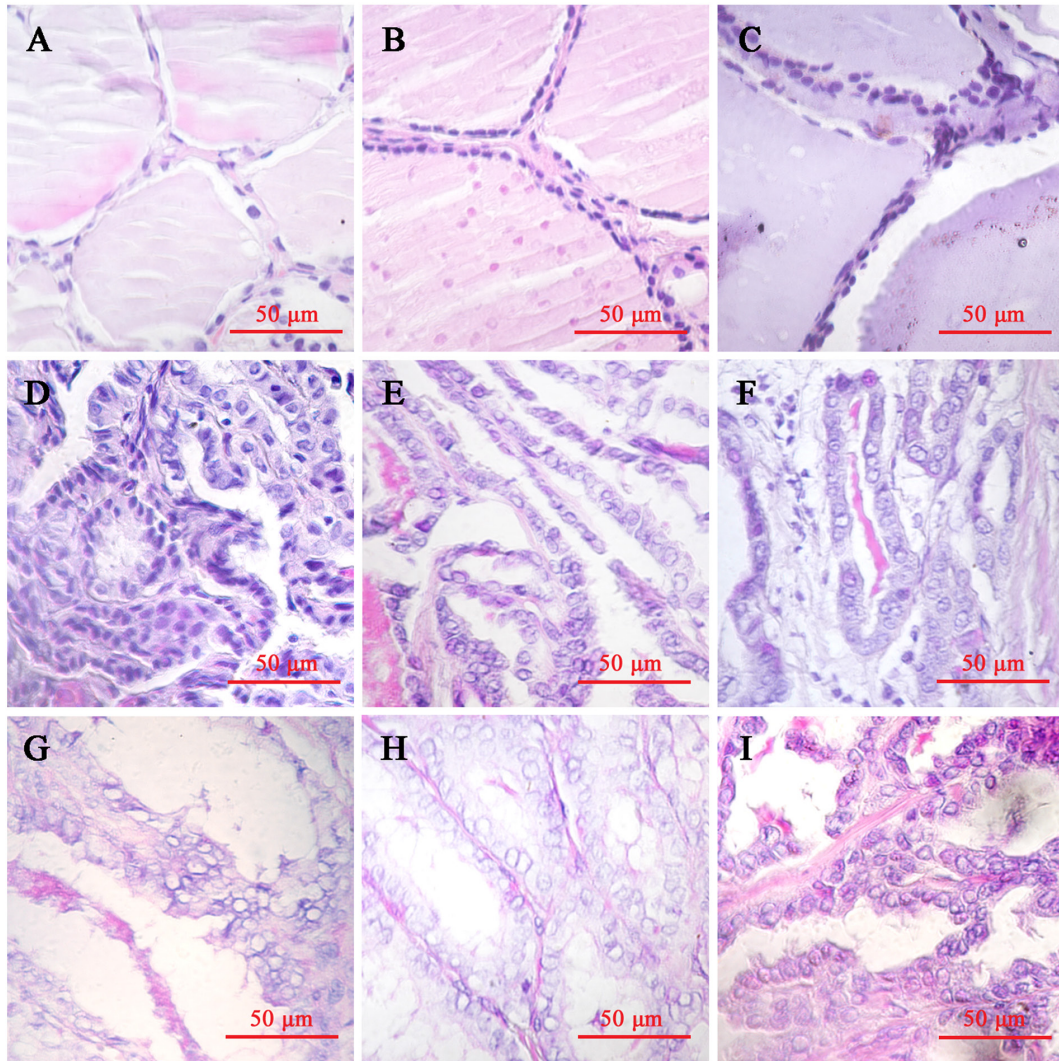

Supplement: Supplementary file 1 [file downloadSupplementary]
